# Supplementary material for: Circumvention of common labeling artifacts using secondary nanobodies
Source: bioRxiv or medRxiv preprint supplement (doi:10.1101/818351), 2019-10-25
Supplement: Supplementary file [file media-1.pdf]

## Supplementary Information

### Circumvention of common labelling artifacts using secondary nanobodies

Shama Sograte-Idrissi<sup>1,2,3</sup>, Thomas Schlichthaerle<sup>4,5</sup>, Carlos J. Duque-Afonso<sup>6,7,8,9</sup>, Mihai Alevra<sup>1</sup>, Sebastian Strauss<sup>4,5</sup>, Tobias Moser<sup>6,7,8,9</sup>, Ralf Jungmann<sup>4,5</sup>, Silvio Rizzoli<sup>1,2,8</sup>, Felipe Opazo<sup>1,2,10</sup> \*

<sup>1</sup>Institute of Neuro- and Sensory Physiology, University Medical Center Göttingen, 37073 Göttingen, Germany

<sup>2</sup>Center for Biostructural Imaging of Neurodegeneration (BIN), University of Göttingen Medical Center, 37075 Göttingen, Germany

<sup>3</sup> International Max Planck Research School for Molecular Biology, Göttingen, Germany

<sup>4</sup> Faculty of Physics and Center for Nanoscience, LMU Munich, 80539, Munich, Germany

<sup>5</sup> Max Planck Institute of Biochemistry, 82152, Martinsried, Germany

<sup>6</sup> Institute for Auditory Neuroscience and InnerEarLab, University Medical Center Göttingen, 37075 Göttingen, Germany.

<sup>7</sup> Max Planck Institute for Experimental Medicine, 37075 Göttingen, Germany

<sup>8</sup> Multiscale Bioimaging Cluster of Excellence (MBExC), Göttingen, Germany

<sup>9</sup> University of Göttingen, 37075 Göttingen, Germany

<sup>10</sup> NanoTag Biotechnologies GmbH, 37079, Göttingen, Germany

Key words: DNA-PAINT, STED microscopy, immunostaining artifacts, linkage error.

\* Corresponding Author: [fopazo@gwdg.de](mailto:fopazo@gwdg.de)

### Supplementary Table 1 | Antibody used

| Probe name                                                      | Company                                    | Catalogue number                     | Dilution used |
|-----------------------------------------------------------------|--------------------------------------------|--------------------------------------|---------------|
| affibody® anti-IgM coupled to the Star635P                      | Abcam, Cambridge, UK                       | ab36088                              | 1:25          |
| Anti-IgM polyFab' coupled to the Star635P                       | Jackson ImmunoResearch, Cambridgeshire, UK | cleaved with Papain from 109-006-129 | 1:50          |
| Mouse monoclonal anti IgM                                       | Abcam, Cambridge, UK                       | ab193159                             | 1:200         |
| Secondary donkey anti rabbit-Star635P                           | Abberior, Goettingen, Germany              | 2-0012-007-2                         | 1:200         |
| Secondary nanobody anti rabbit-Star635P; FluoTag-X2 anti Rabbit | NanoTag Biotechnology, Goettingen, Germany | N1002-Ab635P                         | 1:50          |
| Monoclonal mouse Anti-GM130                                     | BD bioscience                              | 610822                               | 1:62,5        |
| Monoclonal mouse anti NPC                                       | Abcam, Cambridge, UK                       | ab24609                              | 1:200         |
| Mouse monoclonal anti alpha Tubulin                             | Synaptic Systems, Goettingen, Germany      | 302211                               | 1:500         |
| Secondary nanobody anti mouse FluoTag-X2 anti Mouse kLC         | NanoTag Biotechnology, Goettingen, Germany | N1202                                | 1:100         |
| Secondary donkey anti-mouse antibody                            | Jackson ImmunoResearch, Cambridgeshire, UK | 715-005-151                          | 1:100         |
| Monoclonal mouse anti Beta actin                                | Sigma-Aldrich, Missouri, USA               | A1978                                | 1:100         |
| Polyclonal rabbit anti Lamin B                                  | Sigma-Aldrich, Missouri, USA               | HPA050524)                           | 1:100         |
| FluoTag-X2 anti Mouse kLC LiCor800CW                            | NanoTag Biotechnology, Goettingen, Germany | N1202-Li800                          | 1:500         |
| FluoTag-X2 anti Mouse kLC LiCor680RD                            | NanoTag Biotechnology, Goettingen, Germany | N1202-Li680                          | 1:500         |
| FluoTag-X2 anti Rabbit LiCor800CW                               | NanoTag Biotechnology, Goettingen, Germany | N1202-Li800                          | 1:500         |

### Supplementary Table 2 | Handle sequences

| Handle Name | Sequence        | 5'-mod | 3'-mod  | Company     |
|-------------|-----------------|--------|---------|-------------|
| P1          | TTATACATCTATTTT | Azide  | Atto488 | Biomers.net |
| P3          | TTTCTTCATTATTTT | Azide  | Atto488 | Biomers.net |
| P5          | TTTCAATGTATTTT  | Azide  | Atto488 | Biomers.net |

### Supplementary Table 3 | Imager sequences

| Imager name | Sequence   | 5'-mod | 3'-mod | Company           |
|-------------|------------|--------|--------|-------------------|
| P1*         | CTAGATGTAT | None   | Cy3b   | Eurofins Genomics |
| P3*         | GTAATGAAGA | None   | Cy3b   | Eurofins Genomics |
| P5*         | CATACATTGA | None   | Cy3b   | Eurofins Genomics |

### Supplementary Table 4 | Imaging parameters

| Dataset                                               | Parameters                       | Power @561 nm        |
|-------------------------------------------------------|----------------------------------|----------------------|
| Figure 2A-C: DNA-PAINT Microtubule secondary nanobody | 200ms, 2D, 60k Frames, 2nM. P1*  | 1 kW/cm <sup>2</sup> |
| Figure 2D-F: DNA-PAINT Microtubule secondary antibody | 200ms, 2D, 60k Frames, 2nM. P1*  | 1kW/cm <sup>2</sup>  |
| Figure 3C-E: Bassoon                                  | 150ms, 3D, 30k Frames, 3nM, P5*  | 1 kW/cm <sup>2</sup> |
| Figure 3C-E: Homer                                    | 150ms, 3D, 30k Frames, 6 nM, P3* | 1 kW/cm <sup>2</sup> |

### Supplementary Table 5 | Statistics on BCR autocorrelation Analysis. One-way Anova with Tukey Multiple Comparison Test. ns= non-significant, \*= p ≤ 0.05, \*\*= p ≤ 0.01, \*\*\*= p ≤ 0.001, \*\*\*\*= p ≤ 0.0001

|                         | polyFab' live         | Affibody live                  | 1.Ab+2.Ab live                 | 1.Ab+2Nb live                            |
|-------------------------|-----------------------|--------------------------------|--------------------------------|------------------------------------------|
| polyFab' live           |                       | ns                             | ****                           | **                                       |
| Affibody live           |                       |                                | ****                           | ns                                       |
| 1.Ab+2.Ab live          |                       |                                |                                | ***                                      |
|                         | <b>1.Ab+2.Ab live</b> | <b>1.Ab+2.Ab 10 min 4% PFA</b> | <b>1.Ab+2.Ab 30 min 4% PFA</b> | <b>1.Ab+2.Ab 30 min 4% PFA+ 0.1% GLU</b> |
| 1.Ab+2.Ab live          |                       | ns                             | ***                            | ****                                     |
| 1.Ab+2.Ab 10 min 4% PFA |                       |                                | *                              | ns                                       |
| 1.Ab+2.Ab 30 min 4% PFA |                       |                                |                                | ns                                       |
|                         | <b>1.Ab+2Nb live</b>  | <b>1.Ab+2Nb 10 min 4% PFA</b>  | <b>1.Ab+2Nb 30 min 4% PFA</b>  | <b>1.Ab+2Nb 30 min 4% PFA+ 0.1% GLU</b>  |
| 1.Ab+2Nb live           |                       | ns                             | ns                             | ns                                       |
| 1.Ab+2Nb 10 min 4% PFA  |                       |                                | ns                             | ns                                       |
| 1.Ab+2Nb 30 min 4% PFA  |                       |                                |                                | ns                                       |
|                         | <b>polyFab' live</b>  | <b>polyFab' 10 min 4% PFA</b>  | <b>polyFab' 30 min 4% PFA</b>  | <b>polyFab'30 min 4% PFA+ 0.1% GLU</b>   |
| polyFab' live           |                       | ns                             | ns                             | ns                                       |
| polyFab' 10 min 4% PFA  |                       |                                | ns                             | ns                                       |
| polyFab'30 min 4% PFA   |                       |                                |                                | ns                                       |

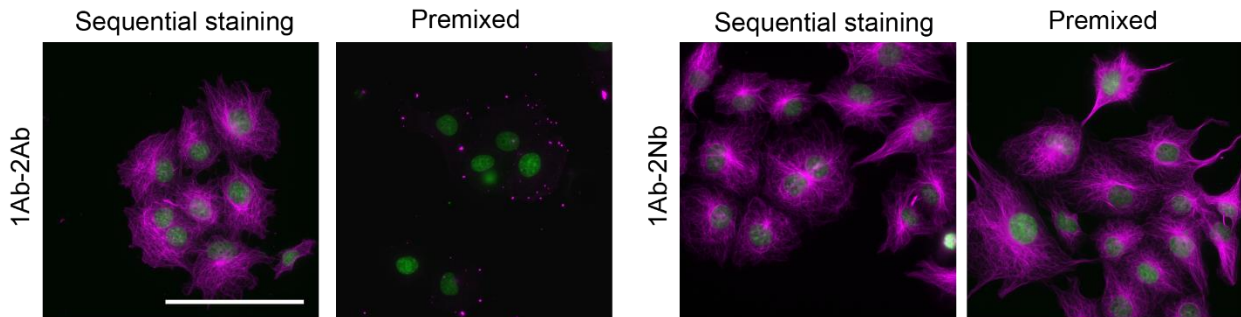

**Supplementary Figure 1:** Pre-mixing antibodies in a centrifuge tube prior incubation on the cell. Immunostaining is commonly done by sequential incubation of the primary probe and the secondary probe. Pre-mixing the two probe in a centrifuge tube prior incubation leads to no staining for 1.Ab-2.Ab while staining is maintained for 1.Ab-2.Nb. Hoechst staining (nucleus) in green, microtubule staining in magenta. Scale bar= 50  $\mu$ m.

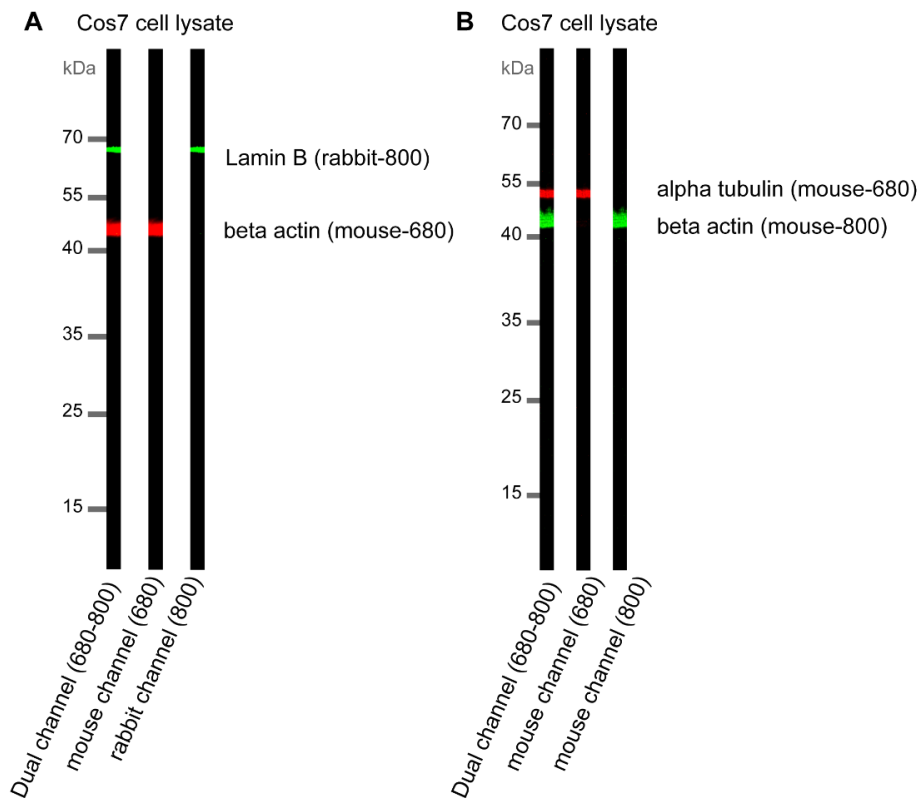

**Supplementary Figure 2:** Pre-mixing 1.Ab-2.Nb for Western Blot. COS-7 cell lysate blotted on nitrocellulose membrane. **A)** Pre-mixing allows shorter protocol by one single step staining. The membrane was stained with 1.Ab beta actin pre-mixed with 2.Nb anti Mouse coupled to IRDye680RD and 1.Ab anti Lamin B pre-mixed with 2.Nb anti

Rabbit-IRDye800CW **B)** Pre-mixing allows use of same species antibodies in the same western blot. The membrane was stained with 1.Ab beta actin pre-mixed with 2.Nb anti Mouse-IRDye800CW and 1.Ab anti alpha tubulin pre-mixed with 2.Nb anti Mouse-IRDye800CW

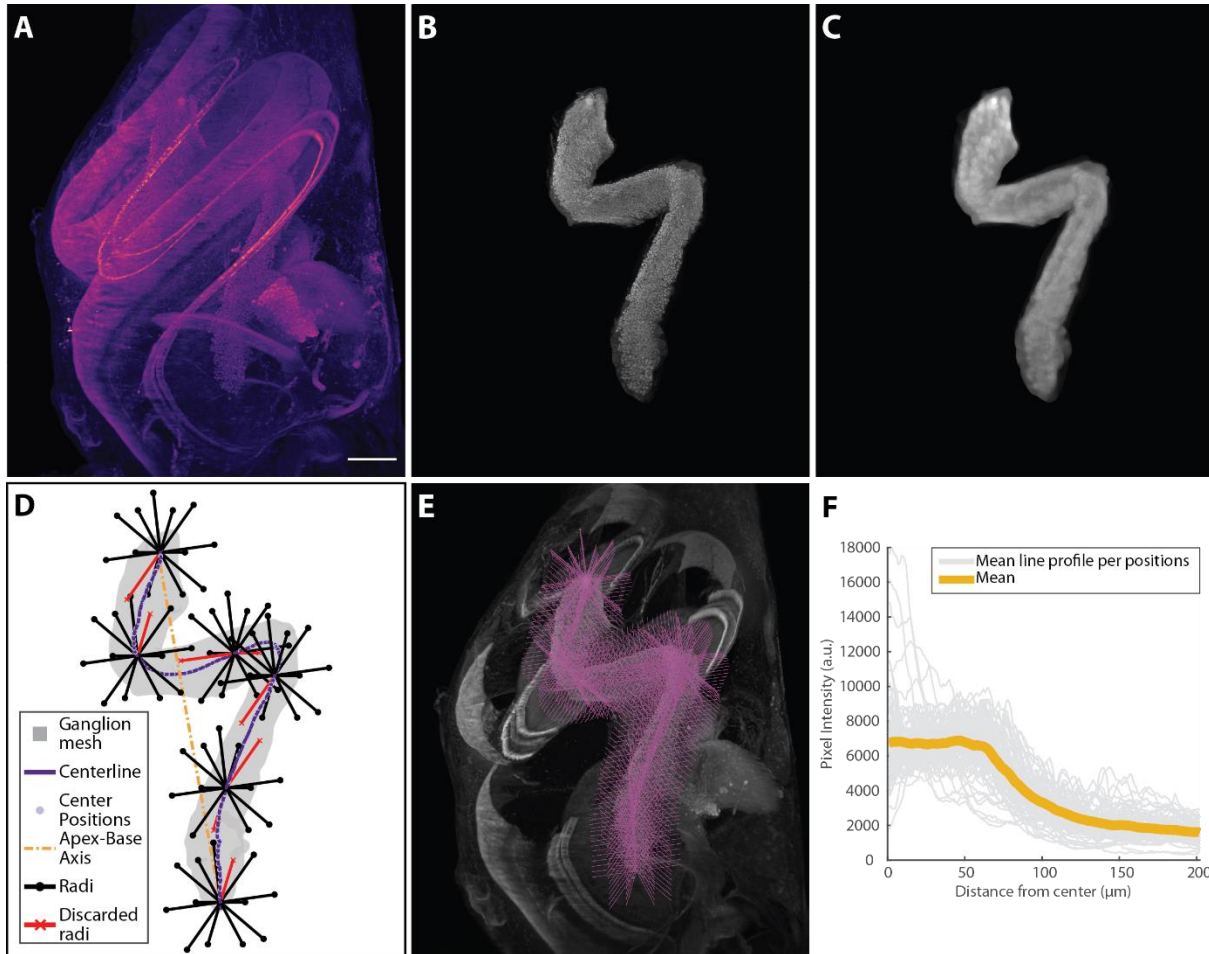

**Supplemental Figure 3.** Method to investigate the sample penetration of different labelling approaches in cochlear staining. **A)** Maximal intensity projection of a cleared cochlea stained with 1.Ab against parvalbumin- $\alpha$  premixed with 2.Nb anti-guinea pig. **B)** Coarse manual segmentation of the ganglion. **C)** Median filtered image of the ganglion (kernel: 10x10x1). **D)** 2D projection of the mesh created from a threshold segmentation of C), its centerline, the apex-base axis, the center positions where the radii fan out and the used and discarded radii. Only 6 out of the 100 center positions and their corresponding radii used are displayed for clarity. **E)** Maximal intensity projections of a sub-stack of the slices that contains only the ganglion. In magenta, all the radii mapped back in the image space. **F)** Mean line profile per position (n=100 positions) and mean line profile for this sample is plotted against the distance from the center position. Scalebar for A-C and E: 200  $\mu\text{m}$ .

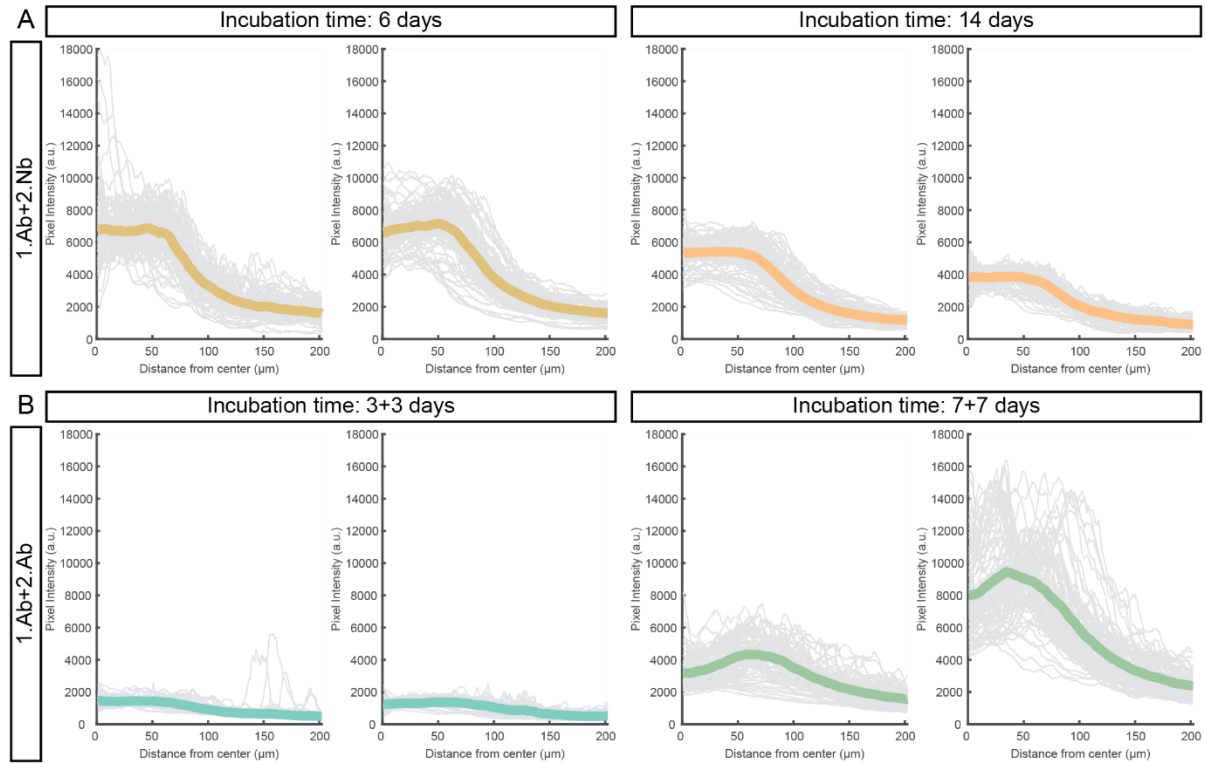

**Supplemental Figure 4. Line profile from individual cochlear samples.** Mean profile per position (n= 100 per sample, grey thin traces) and mean profile per sample (N=2 per staining method and incubation time, color thick traces) are displayed against distance from center position from **A**) Samples stained with a 1.Ab against parvalbumin- $\alpha$  premixed with 2.Nb against guinea pig, labeled with Alexa Fluor 546, and **B**) Samples stained with a 1.Ab against parvalbumin- $\alpha$  revealed by a 2.Ab against guinea pig, labeled with Alexa Fluor 568.

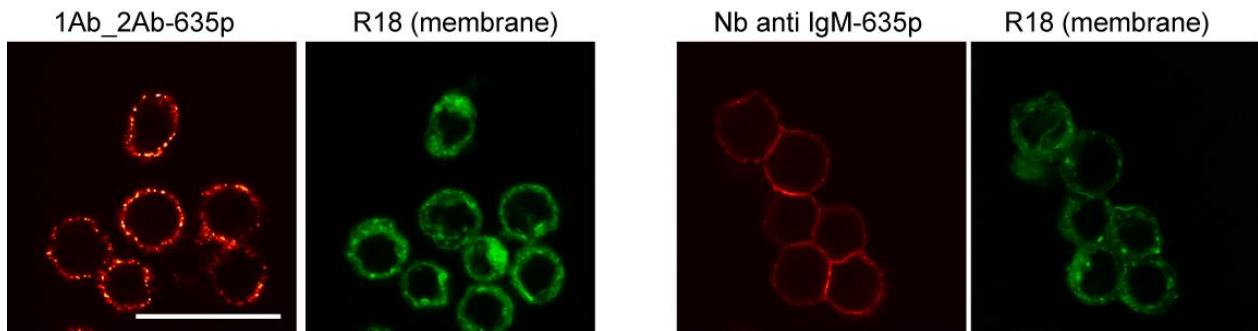

**Supplemental Figure 5:** Diffraction limited images (confocal microscope) of B cells stained with 1.Ab-2.Ab (left panel) or primary nanobody 1Nb (right panel) targeting the IgM of the BCR receptor. In green a membrane staining is performed (R18) to show the integrity of the membrane. z

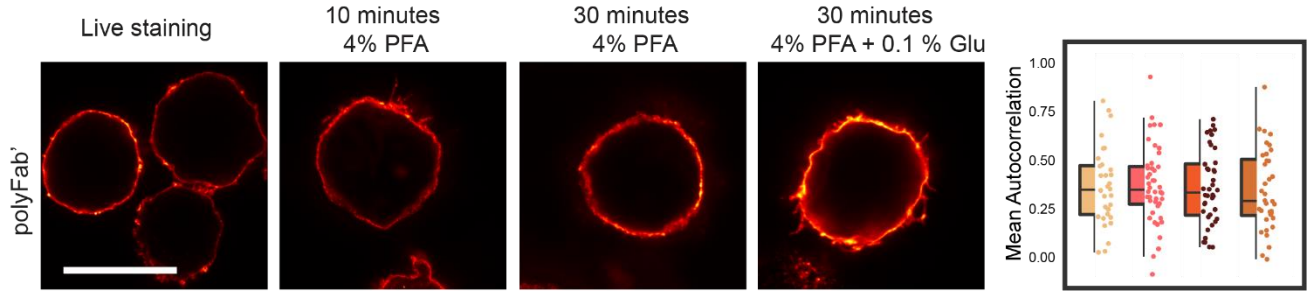

**Supplementary Figure 6:** B cells fixed in different conditions and subsequently stained with polyFab'. STED images and autocorrelation analysis as explained in Fig.4.

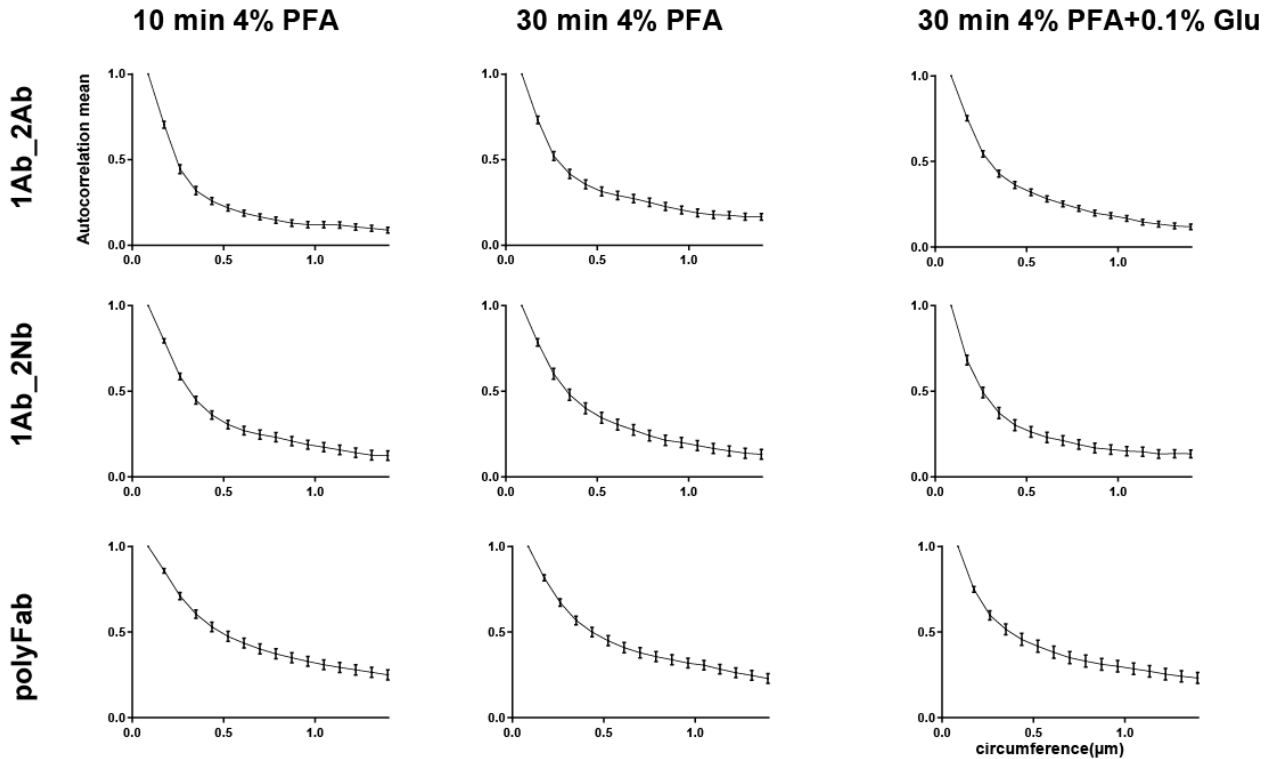

**Supplementary Figure 7:** Autocorrelation curve of B cells fixed prior staining with different fixation conditions. Selected images and analyses are in Figure1 (d-e)
